# Supplementary material for: Comparison of pnicogen and tetrel bonds in complexes containing CX2carbenes (X = F, Cl, Br, OH, OMe, NH2, and NMe2)
Source: Royal Society of Chemistry journal article supplement (doi:10.1039/c9nj03397a), 2019-01-01
Supplement: c9nj03397a1.pdf [file c9nj03397a1.pdf]

Electronic Supplementary Material (ESI) for New Journal of Chemistry

Supporting Information

Comparison of pnictogen and tetrel bonds in the complexes  
containing carbenes  $CX_2$  ( $X = F, Cl, Br, OH, OMe, NH_2,$  and  $NMe_2$ )

Hui Lin<sup>1</sup>, Lingpeng Meng<sup>1,2</sup>, Xiaoyan Li<sup>1,2</sup>, Yanli Zeng<sup>1,2</sup> and Xueying Zhang<sup>\*1,2</sup>

<sup>1</sup>*College of Chemistry and Material Sciences, Hebei Normal University, Shijiazhuang, 050024, P. R. China*

<sup>2</sup>*National Demonstration Center for Experimental Chemistry, Hebei Normal University, Shijiazhuang, 050024, P. R. China*

|                                                                                              |     |
|----------------------------------------------------------------------------------------------|-----|
| Table S1 Second-order stabilization energies associated in $C(OMe)_2$ and $C(NMe_2)_2$ ..... | 2   |
| Table S2 Structure parameter.....                                                            | 3-8 |
| Figure S1 Linear diagram between $E_{ex}$ and $E_{rep}$ .....                                | 9   |
| Figure S2 Polynomial diagram between $E_{pol}$ and $\Delta\alpha$ .....                      | 9   |
| Figure S3 Exponential diagram between $\rho_b(Si \cdots C)$ and $d(Si \cdots C)$ .....       | 9   |

Table S1 Second-order stabilization energies ( $E^{(2)}$ , kcal/mol) associated in  $C(OMe)_2$  and

Table S2: Equilibrium geometries(Å) and total energies (a.u.) for complexes

$C(NMe_2)_2$ .

| 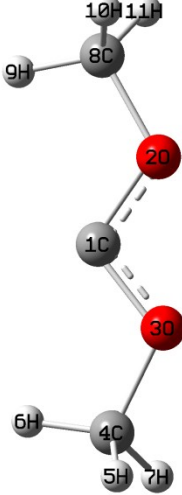 |                 |           |  |                 |           |
|-----------------------------------------------------------------------------------|-----------------|-----------|-------------------------------------------------------------------------------------|-----------------|-----------|
| Donor NBO(i)                                                                      | Acceptor NBO(j) | $E^{(2)}$ | Donor NBO(i)                                                                        | Acceptor NBO(j) | $E^{(2)}$ |
| BD(1)C4-H5                                                                        | BD*(1)C1-O3     | 1.67      | BD(1)C8-H10                                                                         | BD*(1)C1-N2     | 2.03      |
| BD(1)C4-H7                                                                        | BD*(1)C1-O3     | 1.67      | BD(1)C8-H10                                                                         | BD*(2)C1-N2     | 1.03      |
| BD(1)C8-H10                                                                       | BD*(1)C1-O2     | 1.67      | BD(1)C8-H11                                                                         | BD*(1)C1-N2     | 2.92      |
| BD(1)C8-H11                                                                       | BD*(1)C1-O2     | 1.67      | BD(1)C8-H11                                                                         | BD*(2)C1-N2     | 1.16      |
|                                                                                   |                 |           | BD(1)C12-H13                                                                        | BD*(1)C1-N2     | 4.23      |
|                                                                                   |                 |           | BD(1)C12-H13                                                                        | BD*(2)C1-N2     | 1.16      |
|                                                                                   |                 |           | BD(1)C12-H15                                                                        | BD*(1)C1-N2     | 2.15      |
|                                                                                   |                 |           | BD(1)C12-H15                                                                        | BD*(2)C1-N2     | 1.01      |
|                                                                                   |                 |           | BD(1)C4-H5                                                                          | BD*(1)C1-N3     | 2.89      |
|                                                                                   |                 |           | BD(1)C4-H7                                                                          | BD*(1)C1-N3     | 2.05      |
|                                                                                   |                 |           | BD(1)C16-H18                                                                        | BD*(1)C1-N3     | 2.13      |
|                                                                                   |                 |           | BD(1)C16-H19                                                                        | BD*(1)C1-N3     | 4.87      |

|                                                                                     |                                                                                                                                                                                                                                                                                                                                                                                                                                                                                                                                                                                                                                                                                                                                                                                         |             |             |             |             |   |             |             |             |   |             |             |             |   |             |             |             |   |             |             |             |   |             |             |             |    |             |             |             |    |             |             |             |
|-------------------------------------------------------------------------------------|-----------------------------------------------------------------------------------------------------------------------------------------------------------------------------------------------------------------------------------------------------------------------------------------------------------------------------------------------------------------------------------------------------------------------------------------------------------------------------------------------------------------------------------------------------------------------------------------------------------------------------------------------------------------------------------------------------------------------------------------------------------------------------------------|-------------|-------------|-------------|-------------|---|-------------|-------------|-------------|---|-------------|-------------|-------------|---|-------------|-------------|-------------|---|-------------|-------------|-------------|---|-------------|-------------|-------------|----|-------------|-------------|-------------|----|-------------|-------------|-------------|
| 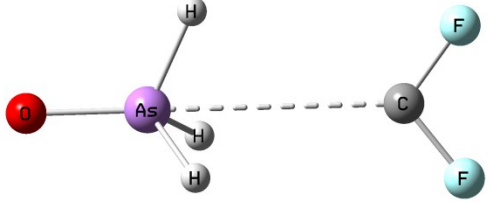   | <p><math>\text{H}_3\text{AsO}\cdots\text{CF}_2</math><br/> MP2= -2548.688623</p> <table border="1"> <tbody> <tr><td>As</td><td>1.26386900</td><td>0.00167200</td><td>-0.00134900</td></tr> <tr><td>H</td><td>0.61491200</td><td>-0.83610500</td><td>-1.05271700</td></tr> <tr><td>H</td><td>0.62231900</td><td>1.33382500</td><td>-0.20788000</td></tr> <tr><td>H</td><td>0.60697400</td><td>-0.48278400</td><td>1.24856500</td></tr> <tr><td>O</td><td>2.89824300</td><td>-0.00639600</td><td>0.00533000</td></tr> <tr><td>C</td><td>-2.19101100</td><td>-0.00074300</td><td>-0.00147700</td></tr> <tr><td>F</td><td>-2.97746700</td><td>-1.03239700</td><td>0.00125300</td></tr> <tr><td>F</td><td>-2.97717400</td><td>1.03078600</td><td>0.00127900</td></tr> </tbody> </table>      | As          | 1.26386900  | 0.00167200  | -0.00134900 | H | 0.61491200  | -0.83610500 | -1.05271700 | H | 0.62231900  | 1.33382500  | -0.20788000 | H | 0.60697400  | -0.48278400 | 1.24856500  | O | 2.89824300  | -0.00639600 | 0.00533000  | C | -2.19101100 | -0.00074300 | -0.00147700 | F  | -2.97746700 | -1.03239700 | 0.00125300  | F  | -2.97717400 | 1.03078600  | 0.00127900  |
| As                                                                                  | 1.26386900                                                                                                                                                                                                                                                                                                                                                                                                                                                                                                                                                                                                                                                                                                                                                                              | 0.00167200  | -0.00134900 |             |             |   |             |             |             |   |             |             |             |   |             |             |             |   |             |             |             |   |             |             |             |    |             |             |             |    |             |             |             |
| H                                                                                   | 0.61491200                                                                                                                                                                                                                                                                                                                                                                                                                                                                                                                                                                                                                                                                                                                                                                              | -0.83610500 | -1.05271700 |             |             |   |             |             |             |   |             |             |             |   |             |             |             |   |             |             |             |   |             |             |             |    |             |             |             |    |             |             |             |
| H                                                                                   | 0.62231900                                                                                                                                                                                                                                                                                                                                                                                                                                                                                                                                                                                                                                                                                                                                                                              | 1.33382500  | -0.20788000 |             |             |   |             |             |             |   |             |             |             |   |             |             |             |   |             |             |             |   |             |             |             |    |             |             |             |    |             |             |             |
| H                                                                                   | 0.60697400                                                                                                                                                                                                                                                                                                                                                                                                                                                                                                                                                                                                                                                                                                                                                                              | -0.48278400 | 1.24856500  |             |             |   |             |             |             |   |             |             |             |   |             |             |             |   |             |             |             |   |             |             |             |    |             |             |             |    |             |             |             |
| O                                                                                   | 2.89824300                                                                                                                                                                                                                                                                                                                                                                                                                                                                                                                                                                                                                                                                                                                                                                              | -0.00639600 | 0.00533000  |             |             |   |             |             |             |   |             |             |             |   |             |             |             |   |             |             |             |   |             |             |             |    |             |             |             |    |             |             |             |
| C                                                                                   | -2.19101100                                                                                                                                                                                                                                                                                                                                                                                                                                                                                                                                                                                                                                                                                                                                                                             | -0.00074300 | -0.00147700 |             |             |   |             |             |             |   |             |             |             |   |             |             |             |   |             |             |             |   |             |             |             |    |             |             |             |    |             |             |             |
| F                                                                                   | -2.97746700                                                                                                                                                                                                                                                                                                                                                                                                                                                                                                                                                                                                                                                                                                                                                                             | -1.03239700 | 0.00125300  |             |             |   |             |             |             |   |             |             |             |   |             |             |             |   |             |             |             |   |             |             |             |    |             |             |             |    |             |             |             |
| F                                                                                   | -2.97717400                                                                                                                                                                                                                                                                                                                                                                                                                                                                                                                                                                                                                                                                                                                                                                             | 1.03078600  | 0.00127900  |             |             |   |             |             |             |   |             |             |             |   |             |             |             |   |             |             |             |   |             |             |             |    |             |             |             |    |             |             |             |
|   | <p><math>\text{H}_3\text{AsO}\cdots\text{CCl}_2</math><br/> MP2= -3268.622155</p> <table border="1"> <tbody> <tr><td>As</td><td>-1.82573500</td><td>-0.04713200</td><td>0.00049900</td></tr> <tr><td>H</td><td>-1.22593200</td><td>-1.41336200</td><td>0.00363700</td></tr> <tr><td>H</td><td>-1.15868300</td><td>0.60741400</td><td>1.16458500</td></tr> <tr><td>H</td><td>-1.15515600</td><td>0.60372600</td><td>-1.16364700</td></tr> <tr><td>O</td><td>-3.46042600</td><td>0.00831300</td><td>-0.00222700</td></tr> <tr><td>C</td><td>1.46290400</td><td>-0.05138400</td><td>0.00235600</td></tr> <tr><td>Cl</td><td>2.58822900</td><td>-1.32730000</td><td>-0.00057400</td></tr> <tr><td>Cl</td><td>2.27618400</td><td>1.44491100</td><td>-0.00044800</td></tr> </tbody> </table>  | As          | -1.82573500 | -0.04713200 | 0.00049900  | H | -1.22593200 | -1.41336200 | 0.00363700  | H | -1.15868300 | 0.60741400  | 1.16458500  | H | -1.15515600 | 0.60372600  | -1.16364700 | O | -3.46042600 | 0.00831300  | -0.00222700 | C | 1.46290400  | -0.05138400 | 0.00235600  | Cl | 2.58822900  | -1.32730000 | -0.00057400 | Cl | 2.27618400  | 1.44491100  | -0.00044800 |
| As                                                                                  | -1.82573500                                                                                                                                                                                                                                                                                                                                                                                                                                                                                                                                                                                                                                                                                                                                                                             | -0.04713200 | 0.00049900  |             |             |   |             |             |             |   |             |             |             |   |             |             |             |   |             |             |             |   |             |             |             |    |             |             |             |    |             |             |             |
| H                                                                                   | -1.22593200                                                                                                                                                                                                                                                                                                                                                                                                                                                                                                                                                                                                                                                                                                                                                                             | -1.41336200 | 0.00363700  |             |             |   |             |             |             |   |             |             |             |   |             |             |             |   |             |             |             |   |             |             |             |    |             |             |             |    |             |             |             |
| H                                                                                   | -1.15868300                                                                                                                                                                                                                                                                                                                                                                                                                                                                                                                                                                                                                                                                                                                                                                             | 0.60741400  | 1.16458500  |             |             |   |             |             |             |   |             |             |             |   |             |             |             |   |             |             |             |   |             |             |             |    |             |             |             |    |             |             |             |
| H                                                                                   | -1.15515600                                                                                                                                                                                                                                                                                                                                                                                                                                                                                                                                                                                                                                                                                                                                                                             | 0.60372600  | -1.16364700 |             |             |   |             |             |             |   |             |             |             |   |             |             |             |   |             |             |             |   |             |             |             |    |             |             |             |    |             |             |             |
| O                                                                                   | -3.46042600                                                                                                                                                                                                                                                                                                                                                                                                                                                                                                                                                                                                                                                                                                                                                                             | 0.00831300  | -0.00222700 |             |             |   |             |             |             |   |             |             |             |   |             |             |             |   |             |             |             |   |             |             |             |    |             |             |             |    |             |             |             |
| C                                                                                   | 1.46290400                                                                                                                                                                                                                                                                                                                                                                                                                                                                                                                                                                                                                                                                                                                                                                              | -0.05138400 | 0.00235600  |             |             |   |             |             |             |   |             |             |             |   |             |             |             |   |             |             |             |   |             |             |             |    |             |             |             |    |             |             |             |
| Cl                                                                                  | 2.58822900                                                                                                                                                                                                                                                                                                                                                                                                                                                                                                                                                                                                                                                                                                                                                                              | -1.32730000 | -0.00057400 |             |             |   |             |             |             |   |             |             |             |   |             |             |             |   |             |             |             |   |             |             |             |    |             |             |             |    |             |             |             |
| Cl                                                                                  | 2.27618400                                                                                                                                                                                                                                                                                                                                                                                                                                                                                                                                                                                                                                                                                                                                                                              | 1.44491100  | -0.00044800 |             |             |   |             |             |             |   |             |             |             |   |             |             |             |   |             |             |             |   |             |             |             |    |             |             |             |    |             |             |             |
|  | <p><math>\text{H}_3\text{AsO}\cdots\text{CBr}_2</math><br/> MP2= -7494.586437</p> <table border="1"> <tbody> <tr><td>As</td><td>-2.56704700</td><td>-0.08184600</td><td>-0.00226600</td></tr> <tr><td>H</td><td>-1.91857100</td><td>0.69903800</td><td>-1.09687600</td></tr> <tr><td>H</td><td>-1.94233400</td><td>-1.42958100</td><td>-0.14374100</td></tr> <tr><td>H</td><td>-1.90329200</td><td>0.46158700</td><td>1.21967200</td></tr> <tr><td>O</td><td>-4.20284400</td><td>-0.05852400</td><td>0.01081200</td></tr> <tr><td>C</td><td>0.66966900</td><td>-0.04854200</td><td>-0.01471500</td></tr> <tr><td>Br</td><td>1.56851400</td><td>1.57585600</td><td>0.00127800</td></tr> <tr><td>Br</td><td>1.86238600</td><td>-1.46930500</td><td>0.00150800</td></tr> </tbody> </table> | As          | -2.56704700 | -0.08184600 | -0.00226600 | H | -1.91857100 | 0.69903800  | -1.09687600 | H | -1.94233400 | -1.42958100 | -0.14374100 | H | -1.90329200 | 0.46158700  | 1.21967200  | O | -4.20284400 | -0.05852400 | 0.01081200  | C | 0.66966900  | -0.04854200 | -0.01471500 | Br | 1.56851400  | 1.57585600  | 0.00127800  | Br | 1.86238600  | -1.46930500 | 0.00150800  |
| As                                                                                  | -2.56704700                                                                                                                                                                                                                                                                                                                                                                                                                                                                                                                                                                                                                                                                                                                                                                             | -0.08184600 | -0.00226600 |             |             |   |             |             |             |   |             |             |             |   |             |             |             |   |             |             |             |   |             |             |             |    |             |             |             |    |             |             |             |
| H                                                                                   | -1.91857100                                                                                                                                                                                                                                                                                                                                                                                                                                                                                                                                                                                                                                                                                                                                                                             | 0.69903800  | -1.09687600 |             |             |   |             |             |             |   |             |             |             |   |             |             |             |   |             |             |             |   |             |             |             |    |             |             |             |    |             |             |             |
| H                                                                                   | -1.94233400                                                                                                                                                                                                                                                                                                                                                                                                                                                                                                                                                                                                                                                                                                                                                                             | -1.42958100 | -0.14374100 |             |             |   |             |             |             |   |             |             |             |   |             |             |             |   |             |             |             |   |             |             |             |    |             |             |             |    |             |             |             |
| H                                                                                   | -1.90329200                                                                                                                                                                                                                                                                                                                                                                                                                                                                                                                                                                                                                                                                                                                                                                             | 0.46158700  | 1.21967200  |             |             |   |             |             |             |   |             |             |             |   |             |             |             |   |             |             |             |   |             |             |             |    |             |             |             |    |             |             |             |
| O                                                                                   | -4.20284400                                                                                                                                                                                                                                                                                                                                                                                                                                                                                                                                                                                                                                                                                                                                                                             | -0.05852400 | 0.01081200  |             |             |   |             |             |             |   |             |             |             |   |             |             |             |   |             |             |             |   |             |             |             |    |             |             |             |    |             |             |             |
| C                                                                                   | 0.66966900                                                                                                                                                                                                                                                                                                                                                                                                                                                                                                                                                                                                                                                                                                                                                                              | -0.04854200 | -0.01471500 |             |             |   |             |             |             |   |             |             |             |   |             |             |             |   |             |             |             |   |             |             |             |    |             |             |             |    |             |             |             |
| Br                                                                                  | 1.56851400                                                                                                                                                                                                                                                                                                                                                                                                                                                                                                                                                                                                                                                                                                                                                                              | 1.57585600  | 0.00127800  |             |             |   |             |             |             |   |             |             |             |   |             |             |             |   |             |             |             |   |             |             |             |    |             |             |             |    |             |             |             |
| Br                                                                                  | 1.86238600                                                                                                                                                                                                                                                                                                                                                                                                                                                                                                                                                                                                                                                                                                                                                                              | -1.46930500 | 0.00150800  |             |             |   |             |             |             |   |             |             |             |   |             |             |             |   |             |             |             |   |             |             |             |    |             |             |             |    |             |             |             |
|                                                                                     | <p><math>\text{H}_3\text{AsO}\cdots\text{C}(\text{OH})_2</math><br/> MP2= -2500.67299</p> <table border="1"> <tbody> <tr><td>As</td><td>1.18388900</td><td>0.00286100</td><td>0.00020200</td></tr> <tr><td>H</td><td>0.53496700</td><td>-0.66216400</td><td>-1.16694600</td></tr> <tr><td>H</td><td>0.55145400</td><td>1.35438500</td><td>0.00137400</td></tr> <tr><td>H</td><td>0.53650700</td><td>-0.66351900</td><td>1.16741500</td></tr> </tbody> </table>                                                                                                                                                                                                                                                                                                                          | As          | 1.18388900  | 0.00286100  | 0.00020200  | H | 0.53496700  | -0.66216400 | -1.16694600 | H | 0.55145400  | 1.35438500  | 0.00137400  | H | 0.53650700  | -0.66351900 | 1.16741500  |   |             |             |             |   |             |             |             |    |             |             |             |    |             |             |             |
| As                                                                                  | 1.18388900                                                                                                                                                                                                                                                                                                                                                                                                                                                                                                                                                                                                                                                                                                                                                                              | 0.00286100  | 0.00020200  |             |             |   |             |             |             |   |             |             |             |   |             |             |             |   |             |             |             |   |             |             |             |    |             |             |             |    |             |             |             |
| H                                                                                   | 0.53496700                                                                                                                                                                                                                                                                                                                                                                                                                                                                                                                                                                                                                                                                                                                                                                              | -0.66216400 | -1.16694600 |             |             |   |             |             |             |   |             |             |             |   |             |             |             |   |             |             |             |   |             |             |             |    |             |             |             |    |             |             |             |
| H                                                                                   | 0.55145400                                                                                                                                                                                                                                                                                                                                                                                                                                                                                                                                                                                                                                                                                                                                                                              | 1.35438500  | 0.00137400  |             |             |   |             |             |             |   |             |             |             |   |             |             |             |   |             |             |             |   |             |             |             |    |             |             |             |    |             |             |             |
| H                                                                                   | 0.53650700                                                                                                                                                                                                                                                                                                                                                                                                                                                                                                                                                                                                                                                                                                                                                                              | -0.66351900 | 1.16741500  |             |             |   |             |             |             |   |             |             |             |   |             |             |             |   |             |             |             |   |             |             |             |    |             |             |             |    |             |             |             |

|                                                                                     |                                                                                                                                                                                                                                                                                                                                                                                                                                                                                                                                                                                                                                                                                                                                                                                                                                                                                                                                                                                                                                                                                                                                                                                                                                                                                                                                                                                                                     |             |             |             |             |   |             |            |             |   |             |             |             |   |             |             |            |   |             |             |             |   |             |             |             |   |            |            |             |   |            |             |             |   |            |             |             |   |            |             |            |   |            |             |            |   |            |             |             |   |            |            |            |   |            |            |            |   |            |            |            |   |            |            |             |
|-------------------------------------------------------------------------------------|---------------------------------------------------------------------------------------------------------------------------------------------------------------------------------------------------------------------------------------------------------------------------------------------------------------------------------------------------------------------------------------------------------------------------------------------------------------------------------------------------------------------------------------------------------------------------------------------------------------------------------------------------------------------------------------------------------------------------------------------------------------------------------------------------------------------------------------------------------------------------------------------------------------------------------------------------------------------------------------------------------------------------------------------------------------------------------------------------------------------------------------------------------------------------------------------------------------------------------------------------------------------------------------------------------------------------------------------------------------------------------------------------------------------|-------------|-------------|-------------|-------------|---|-------------|------------|-------------|---|-------------|-------------|-------------|---|-------------|-------------|------------|---|-------------|-------------|-------------|---|-------------|-------------|-------------|---|------------|------------|-------------|---|------------|-------------|-------------|---|------------|-------------|-------------|---|------------|-------------|------------|---|------------|-------------|------------|---|------------|-------------|-------------|---|------------|------------|------------|---|------------|------------|------------|---|------------|------------|------------|---|------------|------------|-------------|
| 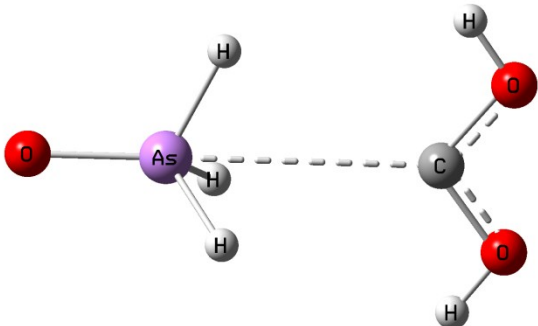   | <table border="1"> <tbody> <tr><td>O</td><td>2.81940300</td><td>-0.00433100</td><td>-0.00091400</td></tr> <tr><td>C</td><td>-2.07899300</td><td>0.00393100</td><td>0.00117500</td></tr> <tr><td>O</td><td>-2.86968500</td><td>-1.05581900</td><td>-0.00060800</td></tr> <tr><td>H</td><td>-2.29180000</td><td>-1.82867300</td><td>0.00077300</td></tr> <tr><td>O</td><td>-2.89783800</td><td>1.04170100</td><td>-0.00060600</td></tr> <tr><td>H</td><td>-2.34054600</td><td>1.82956300</td><td>0.00070400</td></tr> </tbody> </table>                                                                                                                                                                                                                                                                                                                                                                                                                                                                                                                                                                                                                                                                                                                                                                                                                                                                               | O           | 2.81940300  | -0.00433100 | -0.00091400 | C | -2.07899300 | 0.00393100 | 0.00117500  | O | -2.86968500 | -1.05581900 | -0.00060800 | H | -2.29180000 | -1.82867300 | 0.00077300 | O | -2.89783800 | 1.04170100  | -0.00060600 | H | -2.34054600 | 1.82956300  | 0.00070400  |   |            |            |             |   |            |             |             |   |            |             |             |   |            |             |            |   |            |             |            |   |            |             |             |   |            |            |            |   |            |            |            |   |            |            |            |   |            |            |             |
| O                                                                                   | 2.81940300                                                                                                                                                                                                                                                                                                                                                                                                                                                                                                                                                                                                                                                                                                                                                                                                                                                                                                                                                                                                                                                                                                                                                                                                                                                                                                                                                                                                          | -0.00433100 | -0.00091400 |             |             |   |             |            |             |   |             |             |             |   |             |             |            |   |             |             |             |   |             |             |             |   |            |            |             |   |            |             |             |   |            |             |             |   |            |             |            |   |            |             |            |   |            |             |             |   |            |            |            |   |            |            |            |   |            |            |            |   |            |            |             |
| C                                                                                   | -2.07899300                                                                                                                                                                                                                                                                                                                                                                                                                                                                                                                                                                                                                                                                                                                                                                                                                                                                                                                                                                                                                                                                                                                                                                                                                                                                                                                                                                                                         | 0.00393100  | 0.00117500  |             |             |   |             |            |             |   |             |             |             |   |             |             |            |   |             |             |             |   |             |             |             |   |            |            |             |   |            |             |             |   |            |             |             |   |            |             |            |   |            |             |            |   |            |             |             |   |            |            |            |   |            |            |            |   |            |            |            |   |            |            |             |
| O                                                                                   | -2.86968500                                                                                                                                                                                                                                                                                                                                                                                                                                                                                                                                                                                                                                                                                                                                                                                                                                                                                                                                                                                                                                                                                                                                                                                                                                                                                                                                                                                                         | -1.05581900 | -0.00060800 |             |             |   |             |            |             |   |             |             |             |   |             |             |            |   |             |             |             |   |             |             |             |   |            |            |             |   |            |             |             |   |            |             |             |   |            |             |            |   |            |             |            |   |            |             |             |   |            |            |            |   |            |            |            |   |            |            |            |   |            |            |             |
| H                                                                                   | -2.29180000                                                                                                                                                                                                                                                                                                                                                                                                                                                                                                                                                                                                                                                                                                                                                                                                                                                                                                                                                                                                                                                                                                                                                                                                                                                                                                                                                                                                         | -1.82867300 | 0.00077300  |             |             |   |             |            |             |   |             |             |             |   |             |             |            |   |             |             |             |   |             |             |             |   |            |            |             |   |            |             |             |   |            |             |             |   |            |             |            |   |            |             |            |   |            |             |             |   |            |            |            |   |            |            |            |   |            |            |            |   |            |            |             |
| O                                                                                   | -2.89783800                                                                                                                                                                                                                                                                                                                                                                                                                                                                                                                                                                                                                                                                                                                                                                                                                                                                                                                                                                                                                                                                                                                                                                                                                                                                                                                                                                                                         | 1.04170100  | -0.00060600 |             |             |   |             |            |             |   |             |             |             |   |             |             |            |   |             |             |             |   |             |             |             |   |            |            |             |   |            |             |             |   |            |             |             |   |            |             |            |   |            |             |            |   |            |             |             |   |            |            |            |   |            |            |            |   |            |            |            |   |            |            |             |
| H                                                                                   | -2.34054600                                                                                                                                                                                                                                                                                                                                                                                                                                                                                                                                                                                                                                                                                                                                                                                                                                                                                                                                                                                                                                                                                                                                                                                                                                                                                                                                                                                                         | 1.82956300  | 0.00070400  |             |             |   |             |            |             |   |             |             |             |   |             |             |            |   |             |             |             |   |             |             |             |   |            |            |             |   |            |             |             |   |            |             |             |   |            |             |            |   |            |             |            |   |            |             |             |   |            |            |            |   |            |            |            |   |            |            |            |   |            |            |             |
|   | <p>H<sub>3</sub>AsO...C(OMe)<sub>2</sub><br/>MP2= -2579.03143</p> <table border="1"> <tbody> <tr><td>As</td><td>-1.57919500</td><td>-0.06845600</td><td>0.02223800</td></tr> <tr><td>H</td><td>-0.85431100</td><td>0.80653900</td><td>-0.94598900</td></tr> <tr><td>H</td><td>-0.90891500</td><td>-1.38639600</td><td>-0.16717700</td></tr> <tr><td>H</td><td>-1.04943200</td><td>0.38453500</td><td>1.34096200</td></tr> <tr><td>O</td><td>-3.20883400</td><td>-0.07704100</td><td>-0.12514600</td></tr> <tr><td>C</td><td>1.68645000</td><td>0.04269000</td><td>0.12479500</td></tr> <tr><td>O</td><td>2.31737100</td><td>1.16174600</td><td>-0.16788900</td></tr> <tr><td>O</td><td>2.53286900</td><td>-0.92283900</td><td>-0.16757500</td></tr> <tr><td>C</td><td>2.04276800</td><td>-2.25105700</td><td>0.08637800</td></tr> <tr><td>H</td><td>2.85782700</td><td>-2.80471300</td><td>0.54113700</td></tr> <tr><td>H</td><td>1.18813200</td><td>-2.20911200</td><td>0.75486800</td></tr> <tr><td>H</td><td>1.76712300</td><td>-2.70531000</td><td>-0.86166300</td></tr> <tr><td>C</td><td>1.56815000</td><td>2.36096400</td><td>0.09330000</td></tr> <tr><td>H</td><td>0.69393000</td><td>2.12722000</td><td>0.69359300</td></tr> <tr><td>H</td><td>2.22704300</td><td>3.03864200</td><td>0.62684600</td></tr> <tr><td>H</td><td>1.27659200</td><td>2.79714700</td><td>-0.85839600</td></tr> </tbody> </table> | As          | -1.57919500 | -0.06845600 | 0.02223800  | H | -0.85431100 | 0.80653900 | -0.94598900 | H | -0.90891500 | -1.38639600 | -0.16717700 | H | -1.04943200 | 0.38453500  | 1.34096200 | O | -3.20883400 | -0.07704100 | -0.12514600 | C | 1.68645000  | 0.04269000  | 0.12479500  | O | 2.31737100 | 1.16174600 | -0.16788900 | O | 2.53286900 | -0.92283900 | -0.16757500 | C | 2.04276800 | -2.25105700 | 0.08637800  | H | 2.85782700 | -2.80471300 | 0.54113700 | H | 1.18813200 | -2.20911200 | 0.75486800 | H | 1.76712300 | -2.70531000 | -0.86166300 | C | 1.56815000 | 2.36096400 | 0.09330000 | H | 0.69393000 | 2.12722000 | 0.69359300 | H | 2.22704300 | 3.03864200 | 0.62684600 | H | 1.27659200 | 2.79714700 | -0.85839600 |
| As                                                                                  | -1.57919500                                                                                                                                                                                                                                                                                                                                                                                                                                                                                                                                                                                                                                                                                                                                                                                                                                                                                                                                                                                                                                                                                                                                                                                                                                                                                                                                                                                                         | -0.06845600 | 0.02223800  |             |             |   |             |            |             |   |             |             |             |   |             |             |            |   |             |             |             |   |             |             |             |   |            |            |             |   |            |             |             |   |            |             |             |   |            |             |            |   |            |             |            |   |            |             |             |   |            |            |            |   |            |            |            |   |            |            |            |   |            |            |             |
| H                                                                                   | -0.85431100                                                                                                                                                                                                                                                                                                                                                                                                                                                                                                                                                                                                                                                                                                                                                                                                                                                                                                                                                                                                                                                                                                                                                                                                                                                                                                                                                                                                         | 0.80653900  | -0.94598900 |             |             |   |             |            |             |   |             |             |             |   |             |             |            |   |             |             |             |   |             |             |             |   |            |            |             |   |            |             |             |   |            |             |             |   |            |             |            |   |            |             |            |   |            |             |             |   |            |            |            |   |            |            |            |   |            |            |            |   |            |            |             |
| H                                                                                   | -0.90891500                                                                                                                                                                                                                                                                                                                                                                                                                                                                                                                                                                                                                                                                                                                                                                                                                                                                                                                                                                                                                                                                                                                                                                                                                                                                                                                                                                                                         | -1.38639600 | -0.16717700 |             |             |   |             |            |             |   |             |             |             |   |             |             |            |   |             |             |             |   |             |             |             |   |            |            |             |   |            |             |             |   |            |             |             |   |            |             |            |   |            |             |            |   |            |             |             |   |            |            |            |   |            |            |            |   |            |            |            |   |            |            |             |
| H                                                                                   | -1.04943200                                                                                                                                                                                                                                                                                                                                                                                                                                                                                                                                                                                                                                                                                                                                                                                                                                                                                                                                                                                                                                                                                                                                                                                                                                                                                                                                                                                                         | 0.38453500  | 1.34096200  |             |             |   |             |            |             |   |             |             |             |   |             |             |            |   |             |             |             |   |             |             |             |   |            |            |             |   |            |             |             |   |            |             |             |   |            |             |            |   |            |             |            |   |            |             |             |   |            |            |            |   |            |            |            |   |            |            |            |   |            |            |             |
| O                                                                                   | -3.20883400                                                                                                                                                                                                                                                                                                                                                                                                                                                                                                                                                                                                                                                                                                                                                                                                                                                                                                                                                                                                                                                                                                                                                                                                                                                                                                                                                                                                         | -0.07704100 | -0.12514600 |             |             |   |             |            |             |   |             |             |             |   |             |             |            |   |             |             |             |   |             |             |             |   |            |            |             |   |            |             |             |   |            |             |             |   |            |             |            |   |            |             |            |   |            |             |             |   |            |            |            |   |            |            |            |   |            |            |            |   |            |            |             |
| C                                                                                   | 1.68645000                                                                                                                                                                                                                                                                                                                                                                                                                                                                                                                                                                                                                                                                                                                                                                                                                                                                                                                                                                                                                                                                                                                                                                                                                                                                                                                                                                                                          | 0.04269000  | 0.12479500  |             |             |   |             |            |             |   |             |             |             |   |             |             |            |   |             |             |             |   |             |             |             |   |            |            |             |   |            |             |             |   |            |             |             |   |            |             |            |   |            |             |            |   |            |             |             |   |            |            |            |   |            |            |            |   |            |            |            |   |            |            |             |
| O                                                                                   | 2.31737100                                                                                                                                                                                                                                                                                                                                                                                                                                                                                                                                                                                                                                                                                                                                                                                                                                                                                                                                                                                                                                                                                                                                                                                                                                                                                                                                                                                                          | 1.16174600  | -0.16788900 |             |             |   |             |            |             |   |             |             |             |   |             |             |            |   |             |             |             |   |             |             |             |   |            |            |             |   |            |             |             |   |            |             |             |   |            |             |            |   |            |             |            |   |            |             |             |   |            |            |            |   |            |            |            |   |            |            |            |   |            |            |             |
| O                                                                                   | 2.53286900                                                                                                                                                                                                                                                                                                                                                                                                                                                                                                                                                                                                                                                                                                                                                                                                                                                                                                                                                                                                                                                                                                                                                                                                                                                                                                                                                                                                          | -0.92283900 | -0.16757500 |             |             |   |             |            |             |   |             |             |             |   |             |             |            |   |             |             |             |   |             |             |             |   |            |            |             |   |            |             |             |   |            |             |             |   |            |             |            |   |            |             |            |   |            |             |             |   |            |            |            |   |            |            |            |   |            |            |            |   |            |            |             |
| C                                                                                   | 2.04276800                                                                                                                                                                                                                                                                                                                                                                                                                                                                                                                                                                                                                                                                                                                                                                                                                                                                                                                                                                                                                                                                                                                                                                                                                                                                                                                                                                                                          | -2.25105700 | 0.08637800  |             |             |   |             |            |             |   |             |             |             |   |             |             |            |   |             |             |             |   |             |             |             |   |            |            |             |   |            |             |             |   |            |             |             |   |            |             |            |   |            |             |            |   |            |             |             |   |            |            |            |   |            |            |            |   |            |            |            |   |            |            |             |
| H                                                                                   | 2.85782700                                                                                                                                                                                                                                                                                                                                                                                                                                                                                                                                                                                                                                                                                                                                                                                                                                                                                                                                                                                                                                                                                                                                                                                                                                                                                                                                                                                                          | -2.80471300 | 0.54113700  |             |             |   |             |            |             |   |             |             |             |   |             |             |            |   |             |             |             |   |             |             |             |   |            |            |             |   |            |             |             |   |            |             |             |   |            |             |            |   |            |             |            |   |            |             |             |   |            |            |            |   |            |            |            |   |            |            |            |   |            |            |             |
| H                                                                                   | 1.18813200                                                                                                                                                                                                                                                                                                                                                                                                                                                                                                                                                                                                                                                                                                                                                                                                                                                                                                                                                                                                                                                                                                                                                                                                                                                                                                                                                                                                          | -2.20911200 | 0.75486800  |             |             |   |             |            |             |   |             |             |             |   |             |             |            |   |             |             |             |   |             |             |             |   |            |            |             |   |            |             |             |   |            |             |             |   |            |             |            |   |            |             |            |   |            |             |             |   |            |            |            |   |            |            |            |   |            |            |            |   |            |            |             |
| H                                                                                   | 1.76712300                                                                                                                                                                                                                                                                                                                                                                                                                                                                                                                                                                                                                                                                                                                                                                                                                                                                                                                                                                                                                                                                                                                                                                                                                                                                                                                                                                                                          | -2.70531000 | -0.86166300 |             |             |   |             |            |             |   |             |             |             |   |             |             |            |   |             |             |             |   |             |             |             |   |            |            |             |   |            |             |             |   |            |             |             |   |            |             |            |   |            |             |            |   |            |             |             |   |            |            |            |   |            |            |            |   |            |            |            |   |            |            |             |
| C                                                                                   | 1.56815000                                                                                                                                                                                                                                                                                                                                                                                                                                                                                                                                                                                                                                                                                                                                                                                                                                                                                                                                                                                                                                                                                                                                                                                                                                                                                                                                                                                                          | 2.36096400  | 0.09330000  |             |             |   |             |            |             |   |             |             |             |   |             |             |            |   |             |             |             |   |             |             |             |   |            |            |             |   |            |             |             |   |            |             |             |   |            |             |            |   |            |             |            |   |            |             |             |   |            |            |            |   |            |            |            |   |            |            |            |   |            |            |             |
| H                                                                                   | 0.69393000                                                                                                                                                                                                                                                                                                                                                                                                                                                                                                                                                                                                                                                                                                                                                                                                                                                                                                                                                                                                                                                                                                                                                                                                                                                                                                                                                                                                          | 2.12722000  | 0.69359300  |             |             |   |             |            |             |   |             |             |             |   |             |             |            |   |             |             |             |   |             |             |             |   |            |            |             |   |            |             |             |   |            |             |             |   |            |             |            |   |            |             |            |   |            |             |             |   |            |            |            |   |            |            |            |   |            |            |            |   |            |            |             |
| H                                                                                   | 2.22704300                                                                                                                                                                                                                                                                                                                                                                                                                                                                                                                                                                                                                                                                                                                                                                                                                                                                                                                                                                                                                                                                                                                                                                                                                                                                                                                                                                                                          | 3.03864200  | 0.62684600  |             |             |   |             |            |             |   |             |             |             |   |             |             |            |   |             |             |             |   |             |             |             |   |            |            |             |   |            |             |             |   |            |             |             |   |            |             |            |   |            |             |            |   |            |             |             |   |            |            |            |   |            |            |            |   |            |            |            |   |            |            |             |
| H                                                                                   | 1.27659200                                                                                                                                                                                                                                                                                                                                                                                                                                                                                                                                                                                                                                                                                                                                                                                                                                                                                                                                                                                                                                                                                                                                                                                                                                                                                                                                                                                                          | 2.79714700  | -0.85839600 |             |             |   |             |            |             |   |             |             |             |   |             |             |            |   |             |             |             |   |             |             |             |   |            |            |             |   |            |             |             |   |            |             |             |   |            |             |            |   |            |             |            |   |            |             |             |   |            |            |            |   |            |            |            |   |            |            |            |   |            |            |             |
|  | <p>H<sub>3</sub>AsO...C(NMe)<sub>2</sub><br/>MP2= -2617.67295</p> <table border="1"> <tbody> <tr><td>As</td><td>-2.02249800</td><td>-0.04135000</td><td>0.02293000</td></tr> <tr><td>H</td><td>-1.36875100</td><td>1.29556700</td><td>-0.01238200</td></tr> <tr><td>H</td><td>-1.74724200</td><td>-0.59552200</td><td>-1.33242700</td></tr> <tr><td>H</td><td>-1.11947100</td><td>-0.83356000</td><td>0.90789700</td></tr> <tr><td>O</td><td>-3.59796100</td><td>-0.03098200</td><td>0.47853400</td></tr> <tr><td>C</td><td>1.06831000</td><td>-0.01834800</td><td>-0.51433900</td></tr> <tr><td>N</td><td>1.61255000</td><td>1.17025100</td><td>-0.18165000</td></tr> <tr><td>N</td><td>1.71020800</td><td>-1.12759300</td><td>-0.10531500</td></tr> <tr><td>C</td><td>1.05470900</td><td>-2.40020500</td><td>-0.36562700</td></tr> </tbody> </table>                                                                                                                                                                                                                                                                                                                                                                                                                                                                                                                                                              | As          | -2.02249800 | -0.04135000 | 0.02293000  | H | -1.36875100 | 1.29556700 | -0.01238200 | H | -1.74724200 | -0.59552200 | -1.33242700 | H | -1.11947100 | -0.83356000 | 0.90789700 | O | -3.59796100 | -0.03098200 | 0.47853400  | C | 1.06831000  | -0.01834800 | -0.51433900 | N | 1.61255000 | 1.17025100 | -0.18165000 | N | 1.71020800 | -1.12759300 | -0.10531500 | C | 1.05470900 | -2.40020500 | -0.36562700 |   |            |             |            |   |            |             |            |   |            |             |             |   |            |            |            |   |            |            |            |   |            |            |            |   |            |            |             |
| As                                                                                  | -2.02249800                                                                                                                                                                                                                                                                                                                                                                                                                                                                                                                                                                                                                                                                                                                                                                                                                                                                                                                                                                                                                                                                                                                                                                                                                                                                                                                                                                                                         | -0.04135000 | 0.02293000  |             |             |   |             |            |             |   |             |             |             |   |             |             |            |   |             |             |             |   |             |             |             |   |            |            |             |   |            |             |             |   |            |             |             |   |            |             |            |   |            |             |            |   |            |             |             |   |            |            |            |   |            |            |            |   |            |            |            |   |            |            |             |
| H                                                                                   | -1.36875100                                                                                                                                                                                                                                                                                                                                                                                                                                                                                                                                                                                                                                                                                                                                                                                                                                                                                                                                                                                                                                                                                                                                                                                                                                                                                                                                                                                                         | 1.29556700  | -0.01238200 |             |             |   |             |            |             |   |             |             |             |   |             |             |            |   |             |             |             |   |             |             |             |   |            |            |             |   |            |             |             |   |            |             |             |   |            |             |            |   |            |             |            |   |            |             |             |   |            |            |            |   |            |            |            |   |            |            |            |   |            |            |             |
| H                                                                                   | -1.74724200                                                                                                                                                                                                                                                                                                                                                                                                                                                                                                                                                                                                                                                                                                                                                                                                                                                                                                                                                                                                                                                                                                                                                                                                                                                                                                                                                                                                         | -0.59552200 | -1.33242700 |             |             |   |             |            |             |   |             |             |             |   |             |             |            |   |             |             |             |   |             |             |             |   |            |            |             |   |            |             |             |   |            |             |             |   |            |             |            |   |            |             |            |   |            |             |             |   |            |            |            |   |            |            |            |   |            |            |            |   |            |            |             |
| H                                                                                   | -1.11947100                                                                                                                                                                                                                                                                                                                                                                                                                                                                                                                                                                                                                                                                                                                                                                                                                                                                                                                                                                                                                                                                                                                                                                                                                                                                                                                                                                                                         | -0.83356000 | 0.90789700  |             |             |   |             |            |             |   |             |             |             |   |             |             |            |   |             |             |             |   |             |             |             |   |            |            |             |   |            |             |             |   |            |             |             |   |            |             |            |   |            |             |            |   |            |             |             |   |            |            |            |   |            |            |            |   |            |            |            |   |            |            |             |
| O                                                                                   | -3.59796100                                                                                                                                                                                                                                                                                                                                                                                                                                                                                                                                                                                                                                                                                                                                                                                                                                                                                                                                                                                                                                                                                                                                                                                                                                                                                                                                                                                                         | -0.03098200 | 0.47853400  |             |             |   |             |            |             |   |             |             |             |   |             |             |            |   |             |             |             |   |             |             |             |   |            |            |             |   |            |             |             |   |            |             |             |   |            |             |            |   |            |             |            |   |            |             |             |   |            |            |            |   |            |            |            |   |            |            |            |   |            |            |             |
| C                                                                                   | 1.06831000                                                                                                                                                                                                                                                                                                                                                                                                                                                                                                                                                                                                                                                                                                                                                                                                                                                                                                                                                                                                                                                                                                                                                                                                                                                                                                                                                                                                          | -0.01834800 | -0.51433900 |             |             |   |             |            |             |   |             |             |             |   |             |             |            |   |             |             |             |   |             |             |             |   |            |            |             |   |            |             |             |   |            |             |             |   |            |             |            |   |            |             |            |   |            |             |             |   |            |            |            |   |            |            |            |   |            |            |            |   |            |            |             |
| N                                                                                   | 1.61255000                                                                                                                                                                                                                                                                                                                                                                                                                                                                                                                                                                                                                                                                                                                                                                                                                                                                                                                                                                                                                                                                                                                                                                                                                                                                                                                                                                                                          | 1.17025100  | -0.18165000 |             |             |   |             |            |             |   |             |             |             |   |             |             |            |   |             |             |             |   |             |             |             |   |            |            |             |   |            |             |             |   |            |             |             |   |            |             |            |   |            |             |            |   |            |             |             |   |            |            |            |   |            |            |            |   |            |            |            |   |            |            |             |
| N                                                                                   | 1.71020800                                                                                                                                                                                                                                                                                                                                                                                                                                                                                                                                                                                                                                                                                                                                                                                                                                                                                                                                                                                                                                                                                                                                                                                                                                                                                                                                                                                                          | -1.12759300 | -0.10531500 |             |             |   |             |            |             |   |             |             |             |   |             |             |            |   |             |             |             |   |             |             |             |   |            |            |             |   |            |             |             |   |            |             |             |   |            |             |            |   |            |             |            |   |            |             |             |   |            |            |            |   |            |            |            |   |            |            |            |   |            |            |             |
| C                                                                                   | 1.05470900                                                                                                                                                                                                                                                                                                                                                                                                                                                                                                                                                                                                                                                                                                                                                                                                                                                                                                                                                                                                                                                                                                                                                                                                                                                                                                                                                                                                          | -2.40020500 | -0.36562700 |             |             |   |             |            |             |   |             |             |             |   |             |             |            |   |             |             |             |   |             |             |             |   |            |            |             |   |            |             |             |   |            |             |             |   |            |             |            |   |            |             |            |   |            |             |             |   |            |            |            |   |            |            |            |   |            |            |            |   |            |            |             |

|  |                                                                          |             |             |             |
|--|--------------------------------------------------------------------------|-------------|-------------|-------------|
|  | H                                                                        | 0.96124900  | -2.98040600 | 0.55465000  |
|  | H                                                                        | 0.06871900  | -2.20115600 | -0.77086000 |
|  | H                                                                        | 1.63149200  | -2.98497200 | -1.08641000 |
|  | C                                                                        | 1.03793700  | 2.35471700  | -0.79982000 |
|  | H                                                                        | 0.35832900  | 2.03645800  | -1.58357800 |
|  | H                                                                        | 0.50277700  | 2.96008300  | -0.06218300 |
|  | H                                                                        | 1.82675100  | 2.96837400  | -1.23906500 |
|  | C                                                                        | 2.49018900  | 1.48139300  | 0.94631000  |
|  | H                                                                        | 2.08357200  | 2.35696900  | 1.45507700  |
|  | H                                                                        | 2.50048300  | 0.65719700  | 1.65208900  |
|  | H                                                                        | 3.51242200  | 1.71347000  | 0.64128300  |
|  | C                                                                        | 3.11638400  | -1.27025900 | 0.27403700  |
|  | H                                                                        | 3.68023500  | -0.40281500 | -0.05377800 |
|  | H                                                                        | 3.25573600  | -1.41253900 | 1.34705800  |
|  | H                                                                        | 3.51534600  | -2.14713000 | -0.23695300 |
|  | $\text{H}_3\text{AsO}\cdots\text{C}(\text{NH}_2)_2$<br>MP2= -2460.932106 |             |             |             |
|  | As                                                                       | -1.18300900 | -0.00526400 | -0.00067600 |
|  | H                                                                        | -0.54177300 | -0.29105900 | 1.31314700  |
|  | H                                                                        | -0.54528400 | 1.27571000  | -0.41857400 |
|  | H                                                                        | -0.55765400 | -1.00429700 | -0.91228600 |
|  | O                                                                        | -2.82209000 | 0.00574300  | 0.00543200  |
|  | C                                                                        | 2.03529800  | -0.00677600 | -0.00912100 |
|  | N                                                                        | 2.75045000  | 1.12237300  | 0.00194500  |
|  | H                                                                        | 3.76500300  | 1.16043900  | 0.01670500  |
|  | H                                                                        | 2.27137300  | 2.00264400  | -0.00570700 |
|  | N                                                                        | 2.79830100  | -1.10415100 | 0.00219800  |
|  | H                                                                        | 2.35779300  | -2.00427200 | -0.00594100 |
|  | H                                                                        | 3.81352800  | -1.09829100 | 0.01722400  |

|  |                                                              |            |             |             |
|--|--------------------------------------------------------------|------------|-------------|-------------|
|  | $\text{H}_3\text{SiCN}\cdots\text{CF}_2$<br>MP2= -620.880042 |            |             |             |
|  | Si                                                           | 1.12129600 | 0.00095000  | -0.00150400 |
|  | H                                                            | 0.70655000 | 1.38886900  | -0.25592600 |
|  | H                                                            | 0.70511600 | -0.47327900 | 1.32722100  |

|                                                                                     |                                                                                                                                                                                                                                                                                                                                                                                                                                                                                                                                                                                                                                                                                                                                                                                                                                                       |             |             |             |             |   |             |             |             |   |             |             |             |   |             |             |             |   |             |             |             |   |             |             |             |   |             |             |             |    |             |             |            |    |             |            |            |
|-------------------------------------------------------------------------------------|-------------------------------------------------------------------------------------------------------------------------------------------------------------------------------------------------------------------------------------------------------------------------------------------------------------------------------------------------------------------------------------------------------------------------------------------------------------------------------------------------------------------------------------------------------------------------------------------------------------------------------------------------------------------------------------------------------------------------------------------------------------------------------------------------------------------------------------------------------|-------------|-------------|-------------|-------------|---|-------------|-------------|-------------|---|-------------|-------------|-------------|---|-------------|-------------|-------------|---|-------------|-------------|-------------|---|-------------|-------------|-------------|---|-------------|-------------|-------------|----|-------------|-------------|------------|----|-------------|------------|------------|
| 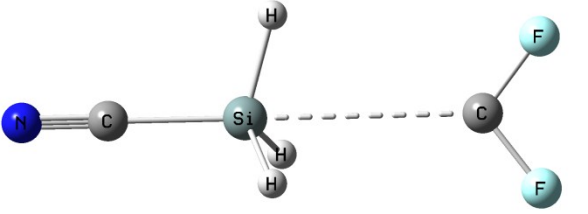   | <table border="1"> <tbody> <tr><td>H</td><td>0.70747800</td><td>-0.91432100</td><td>-1.07595900</td></tr> <tr><td>C</td><td>2.98720900</td><td>0.00104300</td><td>0.00034400</td></tr> <tr><td>N</td><td>4.16191300</td><td>0.00036500</td><td>0.00214900</td></tr> <tr><td>C</td><td>-2.11358700</td><td>0.00298600</td><td>-0.00296400</td></tr> <tr><td>F</td><td>-2.89274800</td><td>-1.03382000</td><td>0.00147000</td></tr> <tr><td>F</td><td>-2.90641000</td><td>1.02923200</td><td>0.00146400</td></tr> </tbody> </table>                                                                                                                                                                                                                                                                                                                     | H           | 0.70747800  | -0.91432100 | -1.07595900 | C | 2.98720900  | 0.00104300  | 0.00034400  | N | 4.16191300  | 0.00036500  | 0.00214900  | C | -2.11358700 | 0.00298600  | -0.00296400 | F | -2.89274800 | -1.03382000 | 0.00147000  | F | -2.90641000 | 1.02923200  | 0.00146400  |   |             |             |             |    |             |             |            |    |             |            |            |
| H                                                                                   | 0.70747800                                                                                                                                                                                                                                                                                                                                                                                                                                                                                                                                                                                                                                                                                                                                                                                                                                            | -0.91432100 | -1.07595900 |             |             |   |             |             |             |   |             |             |             |   |             |             |             |   |             |             |             |   |             |             |             |   |             |             |             |    |             |             |            |    |             |            |            |
| C                                                                                   | 2.98720900                                                                                                                                                                                                                                                                                                                                                                                                                                                                                                                                                                                                                                                                                                                                                                                                                                            | 0.00104300  | 0.00034400  |             |             |   |             |             |             |   |             |             |             |   |             |             |             |   |             |             |             |   |             |             |             |   |             |             |             |    |             |             |            |    |             |            |            |
| N                                                                                   | 4.16191300                                                                                                                                                                                                                                                                                                                                                                                                                                                                                                                                                                                                                                                                                                                                                                                                                                            | 0.00036500  | 0.00214900  |             |             |   |             |             |             |   |             |             |             |   |             |             |             |   |             |             |             |   |             |             |             |   |             |             |             |    |             |             |            |    |             |            |            |
| C                                                                                   | -2.11358700                                                                                                                                                                                                                                                                                                                                                                                                                                                                                                                                                                                                                                                                                                                                                                                                                                           | 0.00298600  | -0.00296400 |             |             |   |             |             |             |   |             |             |             |   |             |             |             |   |             |             |             |   |             |             |             |   |             |             |             |    |             |             |            |    |             |            |            |
| F                                                                                   | -2.89274800                                                                                                                                                                                                                                                                                                                                                                                                                                                                                                                                                                                                                                                                                                                                                                                                                                           | -1.03382000 | 0.00147000  |             |             |   |             |             |             |   |             |             |             |   |             |             |             |   |             |             |             |   |             |             |             |   |             |             |             |    |             |             |            |    |             |            |            |
| F                                                                                   | -2.90641000                                                                                                                                                                                                                                                                                                                                                                                                                                                                                                                                                                                                                                                                                                                                                                                                                                           | 1.02923200  | 0.00146400  |             |             |   |             |             |             |   |             |             |             |   |             |             |             |   |             |             |             |   |             |             |             |   |             |             |             |    |             |             |            |    |             |            |            |
|    | <p>H<sub>3</sub>SiCN...CCl<sub>2</sub><br/>MP2= -1340.813931</p> <table border="1"> <tbody> <tr><td>Si</td><td>-1.65809100</td><td>-0.01059200</td><td>-0.01851100</td></tr> <tr><td>H</td><td>-1.29548200</td><td>1.08269000</td><td>-0.93305100</td></tr> <tr><td>H</td><td>-1.29440200</td><td>-1.34900300</td><td>-0.50736300</td></tr> <tr><td>H</td><td>-1.26477200</td><td>0.23678800</td><td>1.37762000</td></tr> <tr><td>C</td><td>-3.53563900</td><td>-0.00734600</td><td>0.00759200</td></tr> <tr><td>N</td><td>-4.71059100</td><td>-0.00497300</td><td>0.02462000</td></tr> <tr><td>C</td><td>1.21224200</td><td>-0.00881400</td><td>-0.03347300</td></tr> <tr><td>Cl</td><td>2.20163800</td><td>-1.38712800</td><td>0.00910500</td></tr> <tr><td>Cl</td><td>2.15027000</td><td>1.40533900</td><td>0.00883000</td></tr> </tbody> </table> | Si          | -1.65809100 | -0.01059200 | -0.01851100 | H | -1.29548200 | 1.08269000  | -0.93305100 | H | -1.29440200 | -1.34900300 | -0.50736300 | H | -1.26477200 | 0.23678800  | 1.37762000  | C | -3.53563900 | -0.00734600 | 0.00759200  | N | -4.71059100 | -0.00497300 | 0.02462000  | C | 1.21224200  | -0.00881400 | -0.03347300 | Cl | 2.20163800  | -1.38712800 | 0.00910500 | Cl | 2.15027000  | 1.40533900 | 0.00883000 |
| Si                                                                                  | -1.65809100                                                                                                                                                                                                                                                                                                                                                                                                                                                                                                                                                                                                                                                                                                                                                                                                                                           | -0.01059200 | -0.01851100 |             |             |   |             |             |             |   |             |             |             |   |             |             |             |   |             |             |             |   |             |             |             |   |             |             |             |    |             |             |            |    |             |            |            |
| H                                                                                   | -1.29548200                                                                                                                                                                                                                                                                                                                                                                                                                                                                                                                                                                                                                                                                                                                                                                                                                                           | 1.08269000  | -0.93305100 |             |             |   |             |             |             |   |             |             |             |   |             |             |             |   |             |             |             |   |             |             |             |   |             |             |             |    |             |             |            |    |             |            |            |
| H                                                                                   | -1.29440200                                                                                                                                                                                                                                                                                                                                                                                                                                                                                                                                                                                                                                                                                                                                                                                                                                           | -1.34900300 | -0.50736300 |             |             |   |             |             |             |   |             |             |             |   |             |             |             |   |             |             |             |   |             |             |             |   |             |             |             |    |             |             |            |    |             |            |            |
| H                                                                                   | -1.26477200                                                                                                                                                                                                                                                                                                                                                                                                                                                                                                                                                                                                                                                                                                                                                                                                                                           | 0.23678800  | 1.37762000  |             |             |   |             |             |             |   |             |             |             |   |             |             |             |   |             |             |             |   |             |             |             |   |             |             |             |    |             |             |            |    |             |            |            |
| C                                                                                   | -3.53563900                                                                                                                                                                                                                                                                                                                                                                                                                                                                                                                                                                                                                                                                                                                                                                                                                                           | -0.00734600 | 0.00759200  |             |             |   |             |             |             |   |             |             |             |   |             |             |             |   |             |             |             |   |             |             |             |   |             |             |             |    |             |             |            |    |             |            |            |
| N                                                                                   | -4.71059100                                                                                                                                                                                                                                                                                                                                                                                                                                                                                                                                                                                                                                                                                                                                                                                                                                           | -0.00497300 | 0.02462000  |             |             |   |             |             |             |   |             |             |             |   |             |             |             |   |             |             |             |   |             |             |             |   |             |             |             |    |             |             |            |    |             |            |            |
| C                                                                                   | 1.21224200                                                                                                                                                                                                                                                                                                                                                                                                                                                                                                                                                                                                                                                                                                                                                                                                                                            | -0.00881400 | -0.03347300 |             |             |   |             |             |             |   |             |             |             |   |             |             |             |   |             |             |             |   |             |             |             |   |             |             |             |    |             |             |            |    |             |            |            |
| Cl                                                                                  | 2.20163800                                                                                                                                                                                                                                                                                                                                                                                                                                                                                                                                                                                                                                                                                                                                                                                                                                            | -1.38712800 | 0.00910500  |             |             |   |             |             |             |   |             |             |             |   |             |             |             |   |             |             |             |   |             |             |             |   |             |             |             |    |             |             |            |    |             |            |            |
| Cl                                                                                  | 2.15027000                                                                                                                                                                                                                                                                                                                                                                                                                                                                                                                                                                                                                                                                                                                                                                                                                                            | 1.40533900  | 0.00883000  |             |             |   |             |             |             |   |             |             |             |   |             |             |             |   |             |             |             |   |             |             |             |   |             |             |             |    |             |             |            |    |             |            |            |
|  | <p>H<sub>3</sub>SiCN...CBr<sub>2</sub><br/>MP2= -5566.778394</p> <table border="1"> <tbody> <tr><td>Si</td><td>2.36379500</td><td>-0.03451700</td><td>-0.04024300</td></tr> <tr><td>H</td><td>2.03465200</td><td>1.06943700</td><td>-0.95541300</td></tr> <tr><td>H</td><td>1.96396000</td><td>0.20885300</td><td>1.35590000</td></tr> <tr><td>H</td><td>2.02168800</td><td>-1.37512800</td><td>-0.54011900</td></tr> <tr><td>C</td><td>4.24489700</td><td>-0.03593700</td><td>0.01702100</td></tr> <tr><td>N</td><td>5.41956800</td><td>-0.03669600</td><td>0.05348600</td></tr> <tr><td>C</td><td>-0.40071500</td><td>-0.01676800</td><td>-0.07012300</td></tr> <tr><td>Br</td><td>-1.47921100</td><td>-1.51525600</td><td>0.00946900</td></tr> <tr><td>Br</td><td>-1.38123200</td><td>1.54820500</td><td>0.00902300</td></tr> </tbody> </table>    | Si          | 2.36379500  | -0.03451700 | -0.04024300 | H | 2.03465200  | 1.06943700  | -0.95541300 | H | 1.96396000  | 0.20885300  | 1.35590000  | H | 2.02168800  | -1.37512800 | -0.54011900 | C | 4.24489700  | -0.03593700 | 0.01702100  | N | 5.41956800  | -0.03669600 | 0.05348600  | C | -0.40071500 | -0.01676800 | -0.07012300 | Br | -1.47921100 | -1.51525600 | 0.00946900 | Br | -1.38123200 | 1.54820500 | 0.00902300 |
| Si                                                                                  | 2.36379500                                                                                                                                                                                                                                                                                                                                                                                                                                                                                                                                                                                                                                                                                                                                                                                                                                            | -0.03451700 | -0.04024300 |             |             |   |             |             |             |   |             |             |             |   |             |             |             |   |             |             |             |   |             |             |             |   |             |             |             |    |             |             |            |    |             |            |            |
| H                                                                                   | 2.03465200                                                                                                                                                                                                                                                                                                                                                                                                                                                                                                                                                                                                                                                                                                                                                                                                                                            | 1.06943700  | -0.95541300 |             |             |   |             |             |             |   |             |             |             |   |             |             |             |   |             |             |             |   |             |             |             |   |             |             |             |    |             |             |            |    |             |            |            |
| H                                                                                   | 1.96396000                                                                                                                                                                                                                                                                                                                                                                                                                                                                                                                                                                                                                                                                                                                                                                                                                                            | 0.20885300  | 1.35590000  |             |             |   |             |             |             |   |             |             |             |   |             |             |             |   |             |             |             |   |             |             |             |   |             |             |             |    |             |             |            |    |             |            |            |
| H                                                                                   | 2.02168800                                                                                                                                                                                                                                                                                                                                                                                                                                                                                                                                                                                                                                                                                                                                                                                                                                            | -1.37512800 | -0.54011900 |             |             |   |             |             |             |   |             |             |             |   |             |             |             |   |             |             |             |   |             |             |             |   |             |             |             |    |             |             |            |    |             |            |            |
| C                                                                                   | 4.24489700                                                                                                                                                                                                                                                                                                                                                                                                                                                                                                                                                                                                                                                                                                                                                                                                                                            | -0.03593700 | 0.01702100  |             |             |   |             |             |             |   |             |             |             |   |             |             |             |   |             |             |             |   |             |             |             |   |             |             |             |    |             |             |            |    |             |            |            |
| N                                                                                   | 5.41956800                                                                                                                                                                                                                                                                                                                                                                                                                                                                                                                                                                                                                                                                                                                                                                                                                                            | -0.03669600 | 0.05348600  |             |             |   |             |             |             |   |             |             |             |   |             |             |             |   |             |             |             |   |             |             |             |   |             |             |             |    |             |             |            |    |             |            |            |
| C                                                                                   | -0.40071500                                                                                                                                                                                                                                                                                                                                                                                                                                                                                                                                                                                                                                                                                                                                                                                                                                           | -0.01676800 | -0.07012300 |             |             |   |             |             |             |   |             |             |             |   |             |             |             |   |             |             |             |   |             |             |             |   |             |             |             |    |             |             |            |    |             |            |            |
| Br                                                                                  | -1.47921100                                                                                                                                                                                                                                                                                                                                                                                                                                                                                                                                                                                                                                                                                                                                                                                                                                           | -1.51525600 | 0.00946900  |             |             |   |             |             |             |   |             |             |             |   |             |             |             |   |             |             |             |   |             |             |             |   |             |             |             |    |             |             |            |    |             |            |            |
| Br                                                                                  | -1.38123200                                                                                                                                                                                                                                                                                                                                                                                                                                                                                                                                                                                                                                                                                                                                                                                                                                           | 1.54820500  | 0.00902300  |             |             |   |             |             |             |   |             |             |             |   |             |             |             |   |             |             |             |   |             |             |             |   |             |             |             |    |             |             |            |    |             |            |            |
|  | <p>H<sub>3</sub>SiCN...C(OH)<sub>2</sub><br/>MP2= -572.865849</p> <table border="1"> <tbody> <tr><td>Si</td><td>-0.70395200</td><td>-0.08928800</td><td>0.00010400</td></tr> <tr><td>H</td><td>-0.48886900</td><td>-0.83440700</td><td>-1.25367200</td></tr> <tr><td>H</td><td>-0.48889100</td><td>-0.83148300</td><td>1.25559900</td></tr> <tr><td>H</td><td>-0.44052400</td><td>1.37034600</td><td>-0.00149400</td></tr> <tr><td>C</td><td>-2.61514500</td><td>-0.00817700</td><td>-0.00001400</td></tr> <tr><td>N</td><td>-3.79009000</td><td>0.04364100</td><td>-0.00013800</td></tr> </tbody> </table>                                                                                                                                                                                                                                           | Si          | -0.70395200 | -0.08928800 | 0.00010400  | H | -0.48886900 | -0.83440700 | -1.25367200 | H | -0.48889100 | -0.83148300 | 1.25559900  | H | -0.44052400 | 1.37034600  | -0.00149400 | C | -2.61514500 | -0.00817700 | -0.00001400 | N | -3.79009000 | 0.04364100  | -0.00013800 |   |             |             |             |    |             |             |            |    |             |            |            |
| Si                                                                                  | -0.70395200                                                                                                                                                                                                                                                                                                                                                                                                                                                                                                                                                                                                                                                                                                                                                                                                                                           | -0.08928800 | 0.00010400  |             |             |   |             |             |             |   |             |             |             |   |             |             |             |   |             |             |             |   |             |             |             |   |             |             |             |    |             |             |            |    |             |            |            |
| H                                                                                   | -0.48886900                                                                                                                                                                                                                                                                                                                                                                                                                                                                                                                                                                                                                                                                                                                                                                                                                                           | -0.83440700 | -1.25367200 |             |             |   |             |             |             |   |             |             |             |   |             |             |             |   |             |             |             |   |             |             |             |   |             |             |             |    |             |             |            |    |             |            |            |
| H                                                                                   | -0.48889100                                                                                                                                                                                                                                                                                                                                                                                                                                                                                                                                                                                                                                                                                                                                                                                                                                           | -0.83148300 | 1.25559900  |             |             |   |             |             |             |   |             |             |             |   |             |             |             |   |             |             |             |   |             |             |             |   |             |             |             |    |             |             |            |    |             |            |            |
| H                                                                                   | -0.44052400                                                                                                                                                                                                                                                                                                                                                                                                                                                                                                                                                                                                                                                                                                                                                                                                                                           | 1.37034600  | -0.00149400 |             |             |   |             |             |             |   |             |             |             |   |             |             |             |   |             |             |             |   |             |             |             |   |             |             |             |    |             |             |            |    |             |            |            |
| C                                                                                   | -2.61514500                                                                                                                                                                                                                                                                                                                                                                                                                                                                                                                                                                                                                                                                                                                                                                                                                                           | -0.00817700 | -0.00001400 |             |             |   |             |             |             |   |             |             |             |   |             |             |             |   |             |             |             |   |             |             |             |   |             |             |             |    |             |             |            |    |             |            |            |
| N                                                                                   | -3.79009000                                                                                                                                                                                                                                                                                                                                                                                                                                                                                                                                                                                                                                                                                                                                                                                                                                           | 0.04364100  | -0.00013800 |             |             |   |             |             |             |   |             |             |             |   |             |             |             |   |             |             |             |   |             |             |             |   |             |             |             |    |             |             |            |    |             |            |            |

|  |                                                                                                                                                                                                                                                                                                                                                                                                                                                                                                                                                                                                                                                                                                                                                                                                                                                                      |
|--|----------------------------------------------------------------------------------------------------------------------------------------------------------------------------------------------------------------------------------------------------------------------------------------------------------------------------------------------------------------------------------------------------------------------------------------------------------------------------------------------------------------------------------------------------------------------------------------------------------------------------------------------------------------------------------------------------------------------------------------------------------------------------------------------------------------------------------------------------------------------|
|  | <p>C 1.70104100 -0.01642100 0.00010300</p> <p>O 2.61187500 -0.96070400 -0.00010300</p> <p>H 2.14655000 -1.80864000 -0.00004900</p> <p>O 2.32604000 1.13296600 -0.00006600</p> <p>H 1.63900100 1.81821600 -0.00006500</p>                                                                                                                                                                                                                                                                                                                                                                                                                                                                                                                                                                                                                                             |
|  | <p><math>\text{H}_3\text{SiCN}\cdots\text{C}(\text{OMe})_2</math></p> <p>MP2= -651.223396</p> <p>Si 1.34675700 -0.05107200 0.08843400</p> <p>H 0.96076300 0.97673200 -0.89021200</p> <p>H 1.10703600 0.30617100 1.49321100</p> <p>H 0.98508200 -1.42518800 -0.28430400</p> <p>C 3.23016600 -0.06566900 -0.04194000</p> <p>N 4.40277700 -0.07330200 -0.12273700</p> <p>C -1.46466100 0.02116100 0.08873300</p> <p>O -2.28319800 -0.97270100 -0.17547200</p> <p>O -2.14320200 1.11632300 -0.17239700</p> <p>C -1.43993000 2.34742800 0.08261000</p> <p>H -2.18091000 3.04935600 0.45011500</p> <p>H -0.66402100 2.18871100 0.82482800</p> <p>H -1.01186100 2.70715600 -0.84898300</p> <p>C -1.75006200 -2.28719900 0.07868700</p> <p>H -1.01315500 -2.24439100 0.87401800</p> <p>H -2.59447400 -2.90184400 0.37137200</p> <p>H -1.30437000 -2.67187800 -0.83455500</p> |
|  | <p><math>\text{H}_3\text{SiCN}\cdots\text{C}(\text{NMe})_2</math></p> <p>MP2= -689.8683456</p> <p>Si 1.62950700 -0.10140800 -0.04038600</p> <p>H 1.57540600 0.84516100 -1.17949900</p> <p>H 1.45768800 0.39942700 1.34711700</p> <p>H 1.55516800 -1.55686300 -0.26290000</p> <p>C 3.59076100 -0.08556700 0.05609400</p> <p>N 4.76671900 -0.06508100 0.11677700</p> <p>C -0.59860000 -0.02464900 -0.07652100</p> <p>N -1.40810100 -1.09938500 -0.03203700</p> <p>N -1.20592300 1.17086700 0.00034200</p> <p>C -0.42404400 2.39308200 0.16643300</p> <p>H -1.00974700 3.09470200 0.76013000</p>                                                                                                                                                                                                                                                                        |
|  | 7                                                                                                                                                                                                                                                                                                                                                                                                                                                                                                                                                                                                                                                                                                                                                                                                                                                                    |

|  |                                                                          |             |             |             |
|--|--------------------------------------------------------------------------|-------------|-------------|-------------|
|  | H                                                                        | 0.50050800  | 2.18847600  | 0.69145000  |
|  | H                                                                        | -0.20366200 | 2.84621600  | -0.80134900 |
|  | C                                                                        | -0.92297800 | -2.41919300 | -0.42310400 |
|  | H                                                                        | -0.11461100 | -2.32676000 | -1.13632800 |
|  | H                                                                        | -0.58299600 | -2.98930100 | 0.44364000  |
|  | H                                                                        | -1.74736300 | -2.95515400 | -0.89401200 |
|  | C                                                                        | -2.67000600 | -1.15984300 | 0.70355300  |
|  | H                                                                        | -2.64154000 | -2.05354600 | 1.32833200  |
|  | H                                                                        | -2.76315500 | -0.29366200 | 1.35131100  |
|  | H                                                                        | -3.54139600 | -1.22625600 | 0.05055700  |
|  | C                                                                        | -2.57698000 | 1.43736400  | -0.43282200 |
|  | H                                                                        | -2.94627800 | 0.60281200  | -1.02109800 |
|  | H                                                                        | -3.25554200 | 1.62970900  | 0.39900300  |
|  | H                                                                        | -2.55335800 | 2.32278900  | -1.06832000 |
|  | $\text{H}_3\text{SiCN}\cdots\text{C}(\text{NH}_2)_2$<br>MP2= -533.132590 |             |             |             |
|  | Si                                                                       | 0.59059400  | -0.00000200 | 0.01190100  |
|  | H                                                                        | 0.47245900  | 1.30948700  | -0.68805000 |
|  | H                                                                        | 0.45172000  | -0.00035500 | 1.48955900  |
|  | H                                                                        | 0.47259700  | -1.30907600 | -0.68882800 |
|  | C                                                                        | 2.54264400  | 0.00006400  | -0.00051900 |
|  | N                                                                        | 3.71977100  | -0.00007000 | -0.01208000 |
|  | C                                                                        | -1.57370800 | -0.00002000 | -0.02537800 |
|  | N                                                                        | -2.25266700 | 1.13616000  | -0.00197000 |
|  | H                                                                        | -3.25984000 | 1.20844100  | 0.03932300  |
|  | H                                                                        | -1.72953200 | 1.99497600  | -0.04529100 |
|  | N                                                                        | -2.25277000 | -1.13614300 | -0.00194200 |
|  | H                                                                        | -1.72973600 | -1.99501800 | -0.04523300 |
|  | H                                                                        | -3.25995400 | -1.20833000 | 0.03923000  |



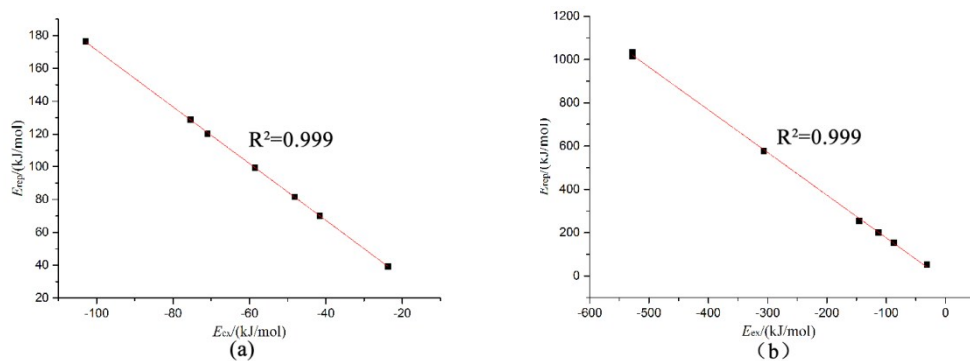

Figure S1: Linear relationship between the exchange energy ( $E_{ex}$ ) and polarization energy ( $E_{rep}$ ) for complexes (a):  $H_3AsO \cdots CX_2$ ; (b):  $H_3SiCN \cdots CX_2$ . (X= F, Cl, Br, OH,  $NH_2$ , OMe,  $(NMe_2)_2$ .)

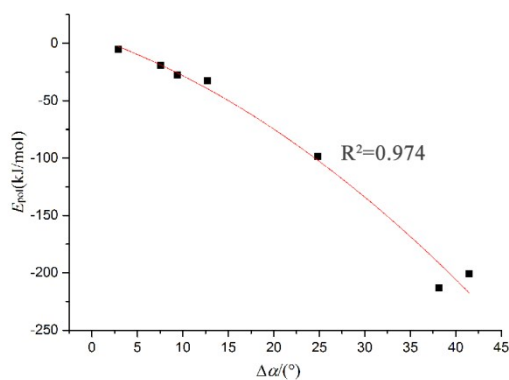

Figure S2: Polynomial correlation between the polarization energy ( $E_{pol}$ ) and the change of dihedral angle of  $SiH_3$  fragment ( $\Delta\alpha$ ) for  $H_3SiCN \cdots CX_2$ . (X= F, Cl, Br, OH,  $NH_2$ , OMe,  $(NMe_2)_2$ .)

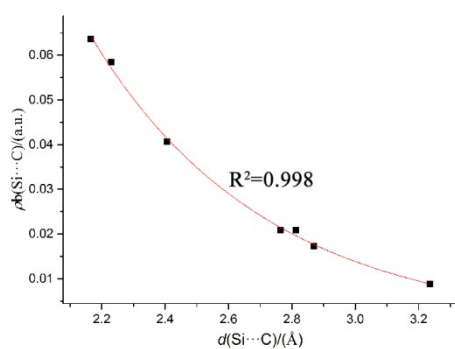

Figure S3: Exponential correlation between the electron density at the BCPs ( $\rho_b(Si \cdots C)$ ) and the binding distances ( $d(Si \cdots C)$ ) of  $H_3SiCN \cdots CX_2$ . (X= F, Cl, Br, OH,  $NH_2$ , OMe,  $(NMe_2)_2$ .)
